# Supplementary material
Source: publisher site journal article supplement (https://www.dovepress.com/article/616996)
Supplement: Supplementary file 1 [file 616996%20Revised%20Supplementary_Material.docx]

# Supplementary Tables

# Supplementary Table 1. Distribution of CRBD severity scores

| **Timepoint / Score** | **Sham Group (n = 59)** | **BA Group (n = 59)** | ***P*** |
| --- | --- | --- | --- |
| 0 h |  |  | 0.771 |
| Score 0 | 4 (6.8%) | 6 (10.2%) |  |
| Score 1 | 20 (33.9%) | 16 (27.1%) |  |
| Score 2 | 21 (35.6%) | 21 (35.6%) |  |
| Score 3 | 14 (23.7%) | 16 (27.1%) |  |
| 1 h |  |  | <0.001* |
| Score 0 | 4 (6.8%) | 13 (22.0%) |  |
| Score 1 | 31 (52.5%) | 38 (64.4%) |  |
| Score 2 | 23 (39.0%) | 8 (13.6%) |  |
| Score 3 | 1 (1.7%) | 0 (0.0%) |  |
| 2 h |  |  | 0.004* |
| Score 0 | 8 (13.6%) | 16 (27.1%) |  |
| Score 1 | 36 (61.0%) | 39 (66.1%) |  |
| Score 2 | 15 (25.4%) | 4 (6.8%) |  |
| Score 3 | 0 (0.0%) | 0 (0.0%) |  |
| 6 h |  |  | 0.118 |
| Score 0 | 11 (18.6%) | 18 (30.5%) |  |
| Score 1 | 43 (72.9%) | 38 (64.4%) |  |
| Score 2 | 5 (8.5%) | 3 (5.1%) |  |
| Score 3 | 0 (0.0%) | 0 (0.0%) |  |
| 24 h |  |  | 0.070 |
| Score 0 | 50 (84.7%) | 56 (94.9%) |  |
| Score 1 | 9 (15.3%) | 3 (5.1%) |  |
| Score 2 | 0 (0.0%) | 0 (0.0%) |  |
| Score 3 | 0 (0.0%) | 0 (0.0%) |  |

**Notes:** Data are presented as n (%). *P* values were calculated using the Mann–Whitney *U* test. The 0 h assessment was performed immediately after extubation and before the intervention. **P* < 0.05.

**Abbreviations:** CRBD, catheter-related bladder discomfort.

# Supplementary Table 2. QoR-15 and RCSQ scores

| **Variable** | **Sham Group (n = 59)** | **BA Group (n = 59)** | **Effect Size (95% CI)** | ***P*** |
| --- | --- | --- | --- | --- |
| QoR-15 Pre-op | 121.0 [105.0, 128.0] | 125.0 [111.5, 132.0] | HL: 2.00 (-3.00, 8.00) | 0.356 |
| QoR-15 POD 1 | 102.0 [100.0, 110.0] | 110.0 [100.5, 118.0] | HL: 5.00 (1.00, 9.00) | 0.004* |
| QoR-15 POD 2 | 133.0 [128.0, 135.0] | 135.0 [128.5, 140.0] | HL: 1.00 (-1.00, 5.00) | 0.238 |
| RCSQ Pre-op | 76.0 [69.5, 89.0] | 78.0 [68.5, 89.0] | HL: 0.00 (-5.00, 5.00) | 0.991 |
| RCSQ POD 1 | 68.0 [65.0, 73.5] | 68.0 [65.0, 76.5] | HL: 1.00 (-2.00, 4.00) | 0.458 |
| RCSQ POD 2 | 83.0 [76.0, 88.0] | 83.0 [79.0, 89.5] | HL: 1.00 (-1.00, 5.00) | 0.303 |

**Notes:** Data are presented as median [IQR]. P values were calculated using the Mann–Whitney U test. Effect estimates are presented as HL estimates (95% CI). **P* < 0.05.

**Abbreviations:** HL, Hodges–Lehmann; Pre-op, preoperative; POD, postoperative day; QoR-15, 15-item Quality of Recovery questionnaire; RCSQ, Richards–Campbell Sleep Questionnaire.

**Supplementary Table 3. Blinding assessment and blinding indices**

| **Treatment guess** | **Sham Group (n = 59)** | **BA Group (n = 59)** |
| --- | --- | --- |
| Real acupuncture | 32 (54.2%) | 29 (49.2%) |
| Sham acupuncture | 11 (18.6%) | 12 (20.3%) |
| Uncertain | 16 (27.1%) | 18 (30.5%) |
| Bang’s BI (95% CI) | −0.356 (−0.554 to −0.158) | 0.288 (0.089 to 0.488) |
| James’ BI (overall; 95% CI) | 0.657 (0.578 to 0.737) | |

**Notes:** Data are presented as n (%) unless otherwise indicated. Bang’s BI was calculated separately for each treatment arm, with “uncertain” responses retained in the denominator. James’ BI was calculated for the trial overall; its 95% CI was estimated using a nonparametric bootstrap procedure with 10,000 resamples. Percentages may not total 100% because of rounding.

**Abbreviations:** BI, blinding index; CI, confidence interval.
